# Supplementary material for: Comparative study on reducing aromatic aldehydes by using ammonia borane and lithium amidoborane as reducing reagents
Source: Royal Society of Chemistry journal article supplement (doi:10.1039/c2nj40227k), 2012-01-01

## Supporting Information

### Comparative study on reducing aromatic aldehydes by using ammonia borane and lithium amidoborane as reducing reagents

Weiliang Xu, Hongjun Fan, Guotao Wu and Ping Chen\*

Dalian National Laboratory for Clean Energy, Dalian Institute of Chemical Physics, Chinese Academy of Sciences, Dalian, China 116023 Fax: +86 411-84685940; Tel: +86 411-84379905; E-mail: [pchen@dicp.ac.cn](mailto:pchen@dicp.ac.cn)

### S1. <sup>1</sup>H and <sup>13</sup>C NMR spectra of the isolated product after NH<sub>3</sub>BD<sub>3</sub> (AB(D)) reacting with benzaldehyde

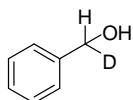

<sup>1</sup>H NMR no 870 ABD benzaldehyde

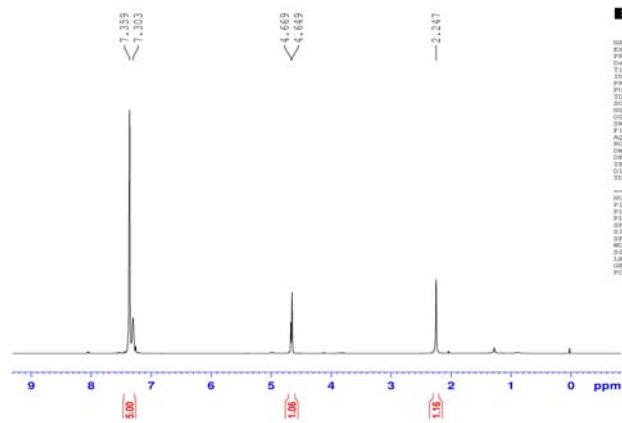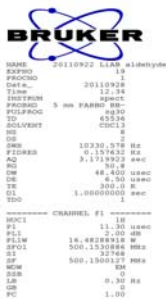

<sup>13</sup>C NMR no 870 ABD benzaldehyde

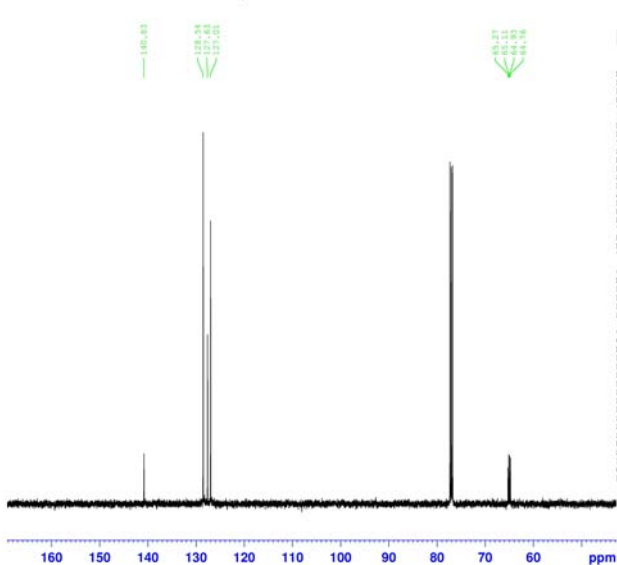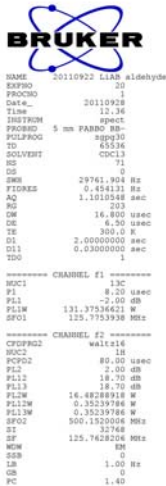

## S2. $^1\text{H}$ NMR and $^{13}\text{C}$ NMR spectra for lithium aminotribenzyl borate

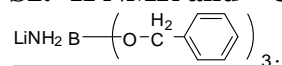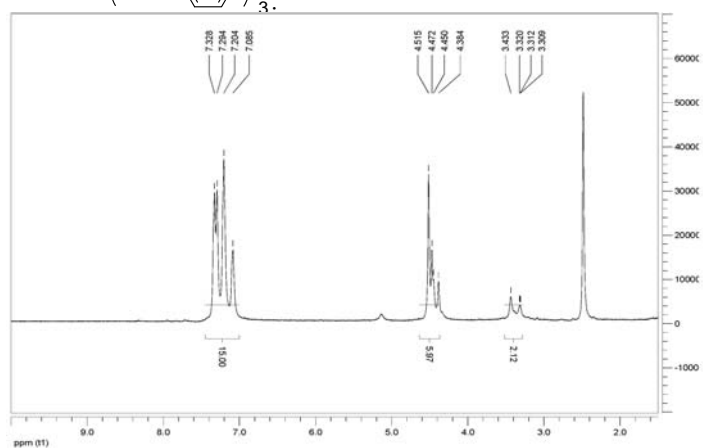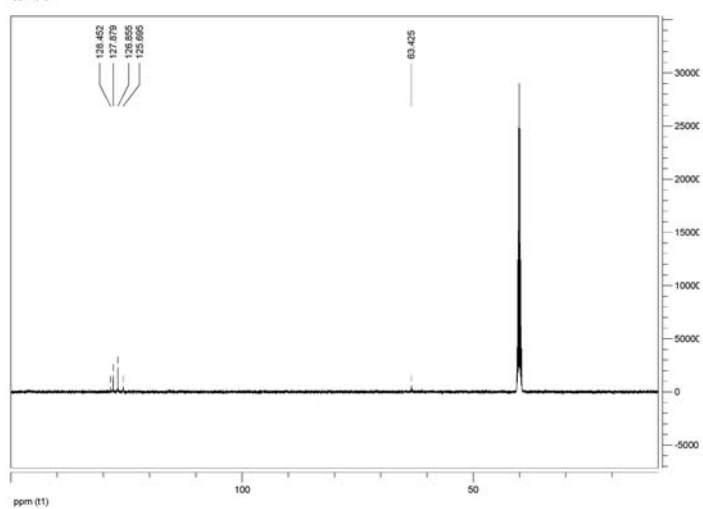

Supplement: c2nj40227k.pdf [file c2nj40227k.pdf]
